# Supplementary material for: Increase in Epithelial Permeability and Cell Metabolism by High Mobility Group Box 1, Inflammatory Cytokines and TPEN in Caco-2 Cells as a Novel Model of Inflammatory Bowel Disease
Source: MDPI journal article supplement (doi:10.3390/ijms21228434), 2020-11-10
Supplement: s1 [file s1]

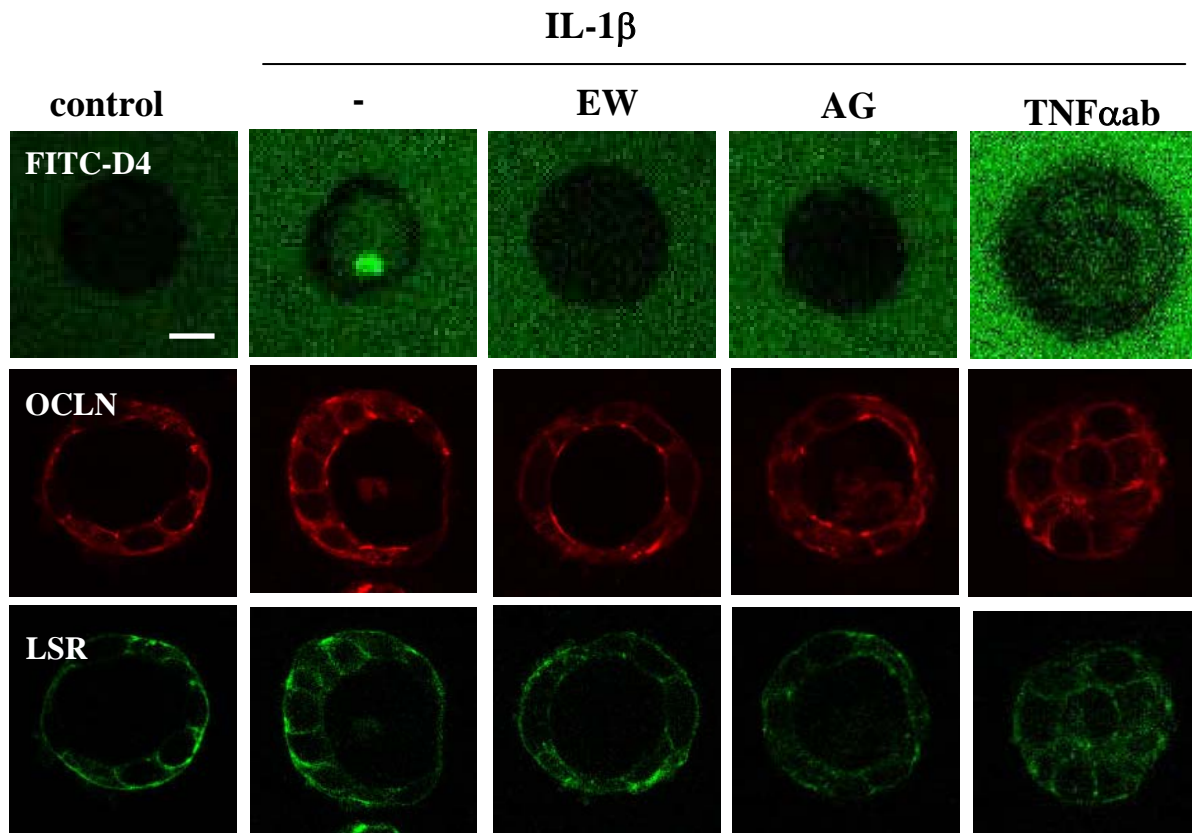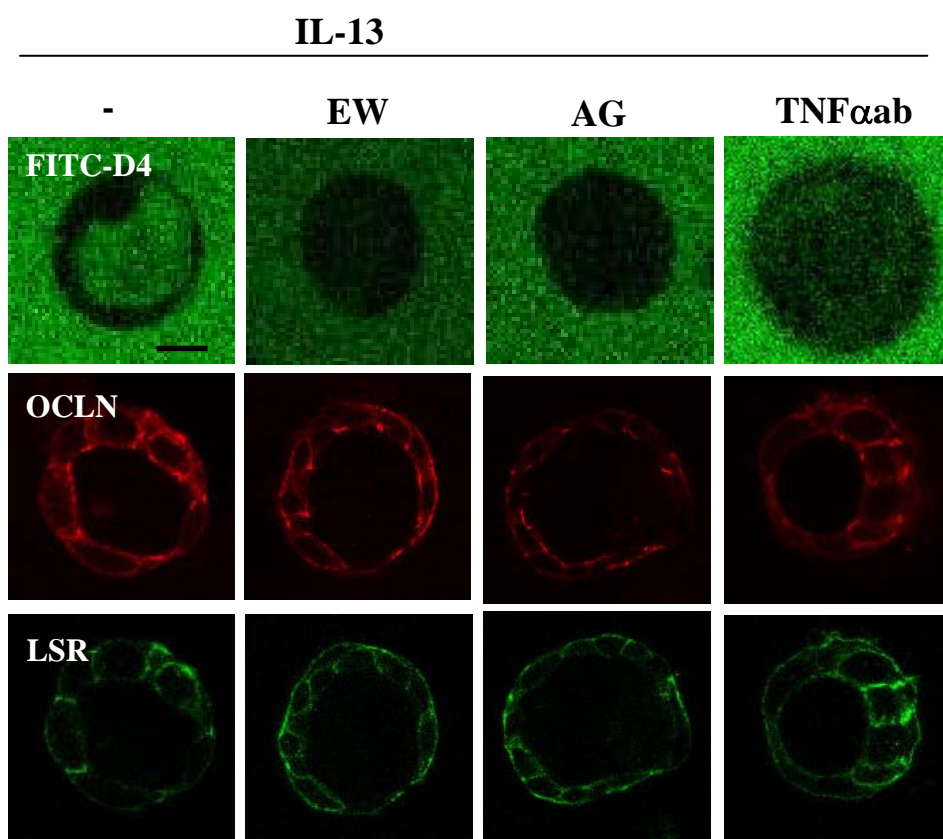

**Supplemental Figure 1: Effects on tight junction molecules treated with IL-1 $\beta$  or IL-13 in 2.5D Matrigel culture of Caco-2 cells. Immunocytochemistry for OCLN, LSR and TRLC in 2.5D Matrigel culture of Caco-2 cells pretreated with 10  $\mu$ M EW-7197, 10  $\mu$ M AG-1478 or 40  $\mu$ g/mL TNF $\alpha$  ab before treatment with 100  $\mu$ g/mL IL-1 $\beta$  or 100  $\mu$ g/mL IL-13. Scale bar: 20  $\mu$ m.**

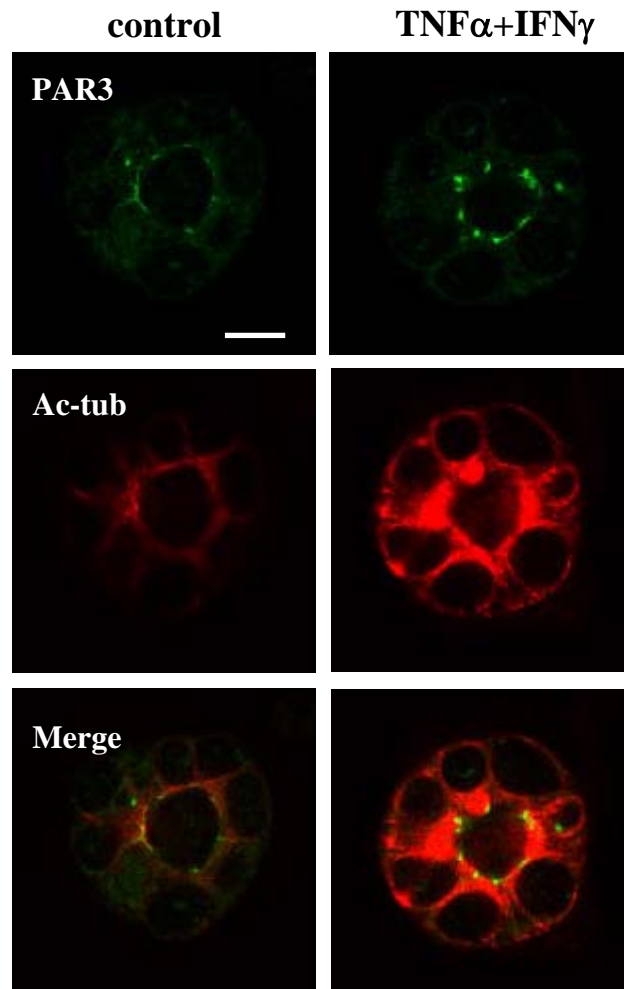

**Supplemental Figure 2: Effects of treatments with TNF $\alpha$  and IFN $\gamma$  on cilia formation in 2.5D Matrigel culture of Caco-2 cells. Immunocytochemistry for PAR3 and Ac-tub in 2.5D Matrigel culture of Caco-2 treated with 100  $\mu$ g/mL TNF $\alpha$  and 100  $\mu$ g/mL IFN $\gamma$ . Scale bar: 20  $\mu$ m.**



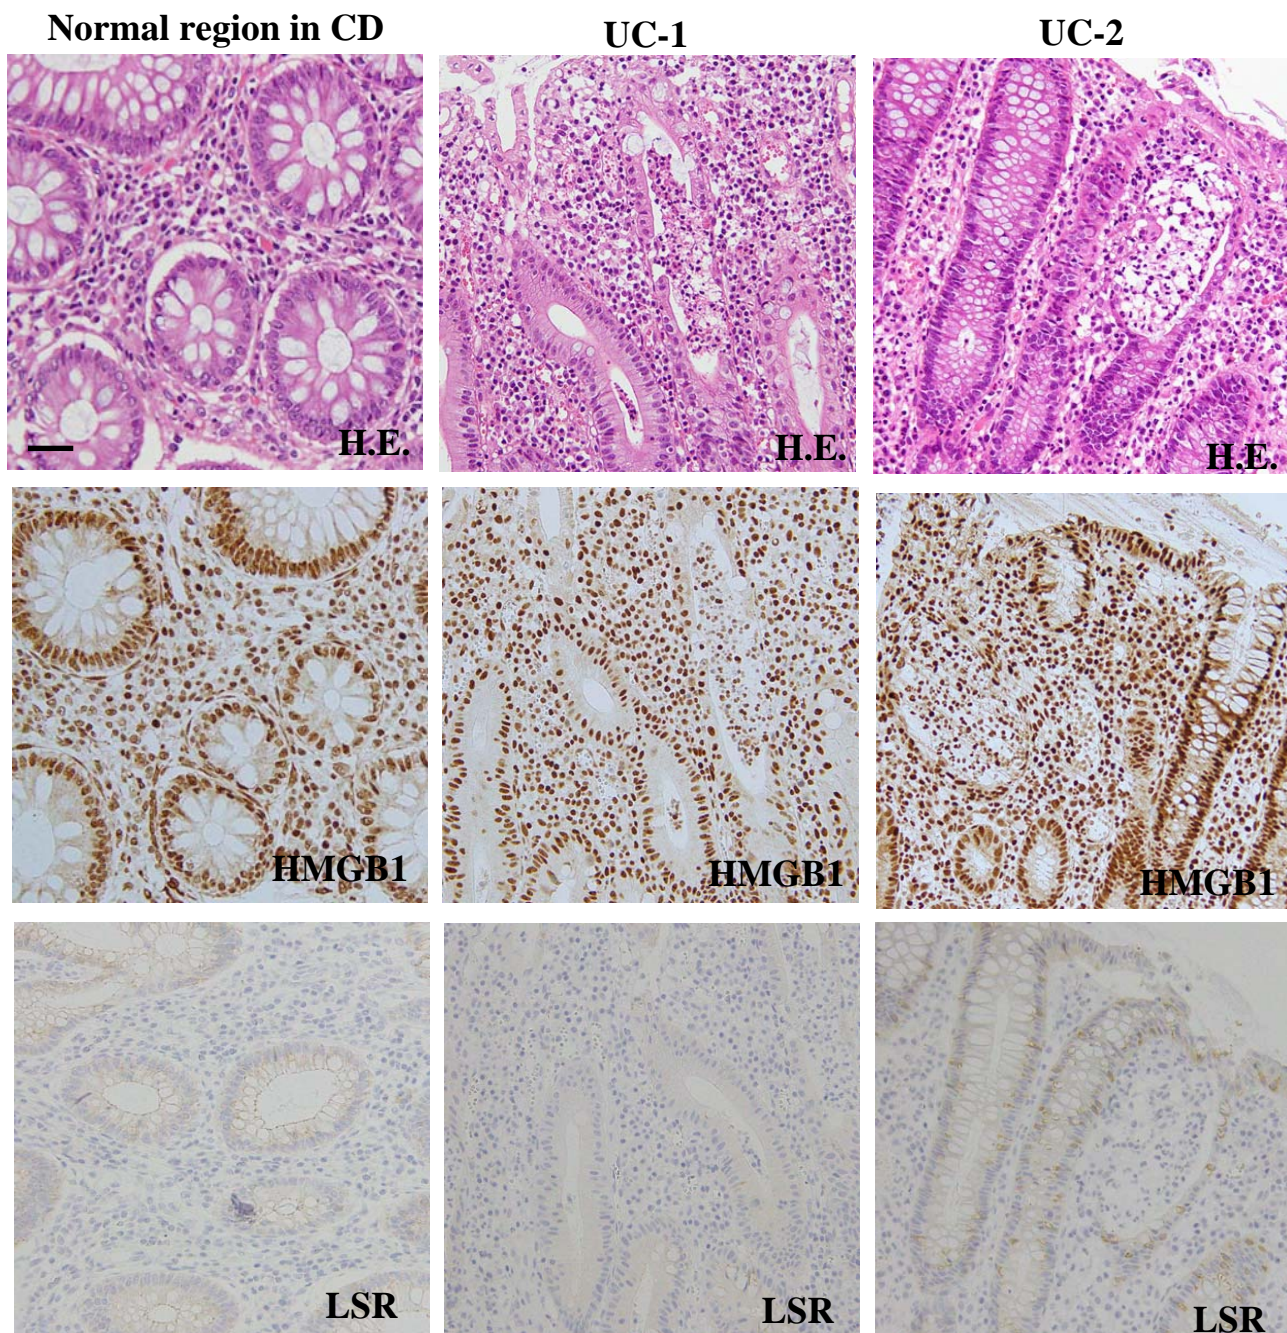

**Supplemental Figure 3: Expression and distribution of LSR and HMGB1 in human normal colonic tissues and IBD tissues. Hematoxylin-eosin (H.E.) staining and immunohistochemical staining for HMGB1 and LSR in normal human colonic tissues and colonic those of the IBD colon. CD: Crohn's disease. UC: Ulcerative colitis. Bar: 50  $\mu$ m.**
